# Supplementary material for: Y-doped In2O3 hollow nanocubes for improved triethylamine-sensing performance
Source: Royal Society of Chemistry journal article supplement (doi:10.1039/d1nj00452b), 2021-01-01
Supplement: d1nj00452b1.pdf [file d1nj00452b1.pdf]

Supplementary Information

Y-doped In<sub>2</sub>O<sub>3</sub> hollow nanocubes for  
improved triethylamine-sensing performance

*Qi Zhao*<sup>\*a</sup>, *Guoce Zhuang*<sup>a</sup>, *Yongbing Zhao*<sup>a</sup>, *Liangliang Yang*<sup>a</sup>, *Jinshan  
Zhao*<sup>b</sup>

a. School of Physics and Electronics Engineering, Yancheng Teachers  
University, Yancheng 224002, China.

b. Dongying Huize Agricultural Technology Co., Ltd., Dongying 257000,  
China.

\*Corresponding author. E-mail: zhaoq@yctu.edu.cn

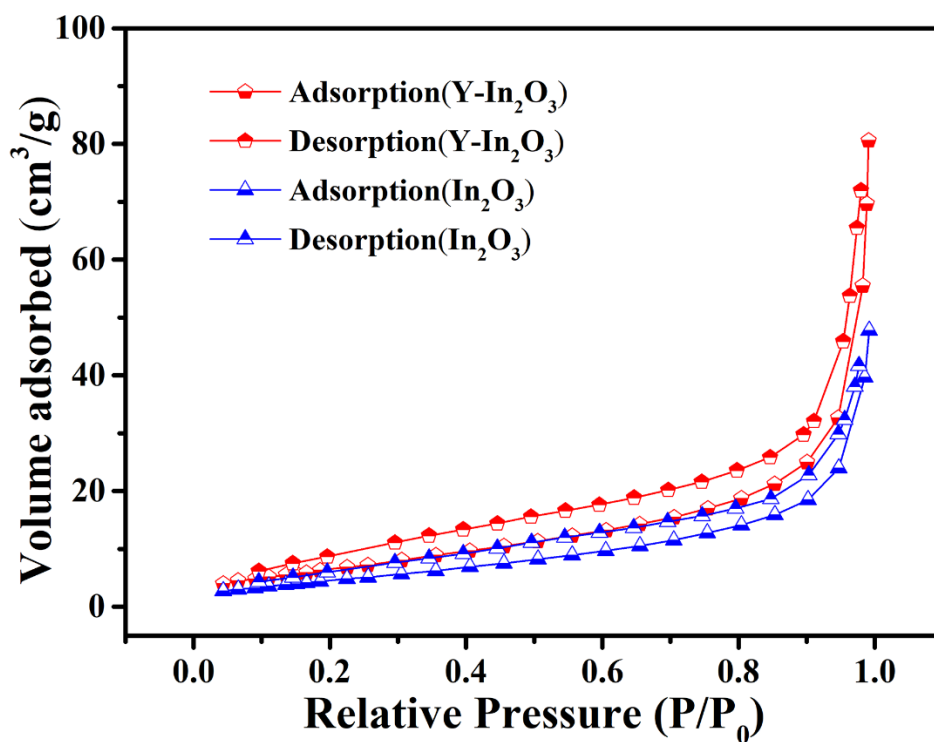

Fig. S1. Nitrogen (N<sub>2</sub>) adsorption-desorption isotherm of the pure In<sub>2</sub>O<sub>3</sub> sample and the Y-In<sub>2</sub>O<sub>3</sub> hollow nanocubes.

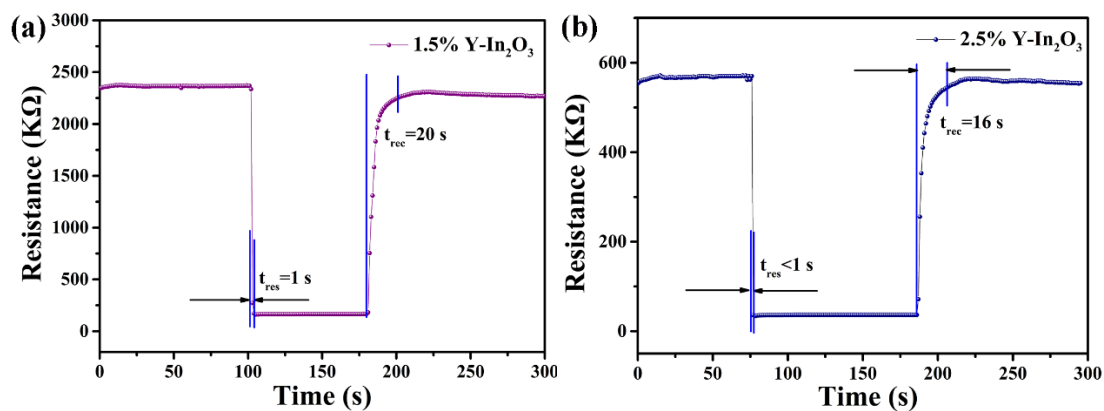

Fig. S2. (a) and (b) Response and recovery time examined to 50 ppm triethylamine of the 1.5% Y-In<sub>2</sub>O<sub>3</sub> and 2.5% Y-In<sub>2</sub>O<sub>3</sub> hollow nanocubes based sensors
